RESEARCH ARTICLE

# Association between medication adherence and illness perceptions in atrial fibrillation patients treated with direct oral anticoagulants: An observational cross-sectional pilot study

Motoyasu Miyazaki<sup>1\*</sup>, Akio Nakashima<sup>1</sup>, Yoshihiko Nakamura<sup>2</sup>, Yuya Sakamoto<sup>1</sup>, Koichi Matsuo<sup>1</sup>, Miwa Goto<sup>1</sup>, Masanobu Uchiyama<sup>1</sup>, Keisuke Okamura<sup>3</sup>, Ryoko Mitsutake<sup>3</sup>, Hidenori Urata<sup>3</sup>, Hidetoshi Kamimura<sup>4</sup>, Osamu Imakyure<sup>1</sup>

**1** Department of Pharmacy, Fukuoka University Chikushi Hospital, Fukuoka, Japan, **2** Department of Emergency and Critical Care Medicine, Faculty of Medicine, Fukuoka University, Fukuoka, Japan, **3** Department of Cardiovascular Diseases, Fukuoka University Chikushi Hospital, Fukuoka, Japan, **4** Department of Pharmacy, Fukuoka University Hospital, Fukuoka, Japan

\* [motoyasu@fukuoka-u.ac.jp](mailto:motoyasu@fukuoka-u.ac.jp)

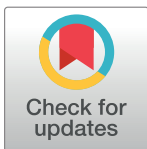

**OPEN ACCESS**

**Citation:** Miyazaki M, Nakashima A, Nakamura Y, Sakamoto Y, Matsuo K, Goto M, et al. (2018) Association between medication adherence and illness perceptions in atrial fibrillation patients treated with direct oral anticoagulants: An observational cross-sectional pilot study. *PLoS ONE* 13(9): e0204814. <https://doi.org/10.1371/journal.pone.0204814>

**Editor:** Michael Nagler, Inselspital Universitatsspital Bern, SWITZERLAND

**Received:** December 18, 2017

**Accepted:** September 15, 2018

**Published:** September 28, 2018

**Copyright:** © 2018 Miyazaki et al. This is an open access article distributed under the terms of the [Creative Commons Attribution License](https://creativecommons.org/licenses/by/4.0/), which permits unrestricted use, distribution, and reproduction in any medium, provided the original author and source are credited.

**Data Availability Statement:** All relevant data are within the paper and its Supporting Information files.

**Funding:** This study is supported by Grant-in-Aid for Encouragement of Scientists (16H00555).

**Competing interests:** The authors have declared that no competing interests exist.

## Abstract

### Objective

The aim of this study was to examine the association between medication adherence and illness perceptions, and to explore the factors associated with poor medication adherence in atrial fibrillation (AF) patients receiving direct oral anticoagulants (DOACs) in a real-world clinical setting.

### Methods

An observational cross-sectional pilot study was conducted at a single Japanese university hospital. One hundred and twenty-nine patients who were diagnosed with AF and who were taking DOACs were recruited from outpatients between January 4<sup>th</sup> and April 25<sup>th</sup>, 2017. We evaluated medication adherence to DOACs using the Morisky Medication Adherence Scale-8 (MMAS-8) and illness perceptions using the Brief Illness Perception Questionnaire (BIPQ). The patients' characteristics and clinical data were collected from electronic medical records.

### Results

Ninety-nine (76.7%) patients (male, n = 74; mean age, 71.4±9.8 years) participated in this study. According to the MMAS-8, 21 (21.2%) of the patients were classified into the poor adherence group (MMAS-8 score of <6), and 78 (78.8%) were classified into the good adherence group (MMAS-8 score of 6–8). A multivariate logistic regression analysis revealed that age (per year, odds ratio [OR] 0.912, 95% confidence interval [CI] 0.853–0.965, p = 0.001), a history of warfarin use (OR 0.181, 95% CI 0.033–0.764, p = 0.019),

duration of DOAC exposure (per 100 days, OR 1.245, 95% CI 1.084–1.460,  $p = 0.001$ ), and the BIPQ emotional response score (per 1 point, OR 1.235, 95% CI 1.015–1.527,  $p = 0.035$ ) were significantly associated with poor medication adherence in AF patients receiving DOACs.

## Conclusion

Poor medication adherence to DOACs was strongly associated with a stronger emotional response (i.e. stronger feelings of anger, anxiety, and depression), as well as younger age, the absence of a history of warfarin treatment, and longer DOAC exposure. Further evaluation of the factors associated with medication adherence in AF patients and the development and execution of strategies for improving poor adherence are warranted in the real-world clinical setting.

## Introduction

Non-valvular atrial fibrillation (AF) is known as one of the most important risk factors for stroke. Data from the Japanese Circulation Society show that in 2005, approximately 0.7 million people suffered from AF in Japan; by 2050, the number is predicted to increase to 1 million (1.09% of the Japanese population) [1]. Until recently, warfarin was the only agent used to prevent stroke in AF; however, direct oral anticoagulants (DOACs), including dabigatran, rivaroxaban, apixaban, and edoxaban, have been approved for anticoagulation therapy in Japan since 2011. A meta-analysis of clinical trials revealed that DOAC therapy reduced stroke or systemic embolic events by 19% and all-cause mortality by 10% [2]. Unlike warfarin, DOACs have many pharmacological advantages, including a rapid onset/offset of action and a short half-life, predictable pharmacokinetics and pharmacodynamics without the need to constantly monitor the prothrombin time–international normalized ratio (PT-INR), a good safety profile, and fewer drug and food interactions [3]; on the other hand, there have some disadvantages, including high cost and potentially lower treatment motivation due to no PT-INR monitoring as therapeutic index. Therefore, physicians should decide which to prescribe DOACs or warfarin for oral anticoagulant (OAC) therapy depending on the patient's clinical and psychological characteristics.

Non-adherence to medication is one of the most important drug-related issues. Adherence to OACs in AF patients is also essential from the viewpoint of clinical efficacy and safety [4]. Shore et al. reported that lower medication adherence to dabigatran was associated with an increased risk for combined all-cause mortality and stroke [5]. Although medication adherence to OACs has been reported in some studies, it is currently controversial because of heterogeneity in the settings and the methods employed to evaluate medication adherence, including the proportion of days covered (PDC), the Morisky Medication Adherence Scale, and other methods [6–10]. Illness perceptions are modifiable factors and have been reported to be a major factor that influences medication adherence in patients with chronic disease [11]. Broadbent et al. developed the Brief Illness Perception Questionnaire (BIPQ) to assess appropriate psychometric properties [12]. Until recently, some reports have indicated that medication adherence was associated with illness perceptions in some diseases [12–16], but not in AF. A previous study by Clarkesmith et al. demonstrated that warfarin-treated AF patients who received some educational intervention for improving their medication

adherence achieved a significantly better improvement of time within the therapeutic range in comparison to patients treated with usual care [17]. Educational intervention for patients who have some factors associated with poor medication adherence may improve the clinical outcome and the safety of their treatment. However, no studies have examined the patients' characteristics, including illness perceptions, and the clinical factors associated with poor medication adherence, especially in AF patients receiving DOACs.

The aim of this study was to examine the association between medication adherence and illness perceptions, and to explore the factors associated with poor medication adherence in AF patients receiving DOACs in a real-world clinical setting.

## Materials and methods

### Study design and population

A questionnaire-based, observational cross-sectional pilot study was conducted at a single Japanese university hospital. Patients who were diagnosed with AF and who were taking DOACs (dabigatran, rivaroxaban, apixaban, or edoxaban) were recruited from outpatients who attended the Department of Cardiovascular Diseases between January 4<sup>th</sup> and April 25<sup>th</sup>, 2017. The outpatients were seen at least once within a four-month period. Since the baseline clinical characteristics of patients who were taking warfarin were assumed to be different from those of patients receiving DOACs, patients who were prescribed warfarin were excluded from this study. Patients were excluded if they were <20 years of age, if they did not self-administer their medications, or if they did not agree to participate in the study. This study was approved by the Fukuoka University-Medical Ethics Review Board (R15-026). All participants provided their written informed consent before enrollment.

### Assessment of medication adherence

Medication adherence was assessed by the Morisky Medication Adherence Scale-8 (MMAS-8), which was developed by Morisky et al—a widely-used self-report questionnaire [18]. The first seven items are Yes/No responses and the last item is a 5-point Likert response. The MMAS-8 has proven quite useful in clinical practice for its capture of the fundamental reasons of underuse, such as forgetfulness, considering the circumstances related to adherence behavior of patients. We have obtained written permission from Donald E. Morisky to use the MMAS-8. According to the MMAS-8, adherence was categorized as high adherence (a score of 8), medium adherence (a score of 6 to <8) and low adherence (a score of <6). The MMAS-8 has been reliable (alpha reliability = 0.83) for the assessment of medication adherence in outpatients with hypertension, and using a cut-point of 6, it was significantly associated with blood pressure control [18], showing that the MMAS-8 was enough to validly screen a patient's medication adherence. To explore the factors associated with poor medication adherence, the patients were divided into two groups: the poor adherence group (a score of < 6) and the good adherence group (a score of 6–8) [18–20]. We also investigated the PDC in patients who has been prescribed DOACs for at least continuous six months without admission before enrollment. PDC was defined as the proportion of days in which medication was available to the patients in a six-month period.

### Assessment of illness perceptions

Illness perceptions were evaluated by the BIPQ [12]. This 9-item questionnaire was designed to assess a patient's cognitive and emotional representations of illness on an 11-point (score 0–10) Likert scale. The questionnaire includes 8 dimensions (items 1 to 8): consequences,

timeline, personal control, treatment control, identity, concerns, understanding, and emotional response. Item 9 of the BIPQ is an open question that explores causal representation, which was not considered in this study. The overall score was calculated as the sum of the reversed scores of items 3, 4, and 7 and the scores of items 1, 2, 5, 6, and 8. Thus, a higher BIPQ overall score reflects that the patient views the illness as more threatening.

### Data collection

The patients' characteristics, clinical information, and prescription information were collected from electronic medical records. The characteristics included gender, age, height, weight, and body mass index (BMI). Current smoking and drinking status, admission within 1 year, history of adverse effects from any drugs, and whether the patient lived alone were collected via interviews with the patients, as well as medical records. Clinical information included comorbidities (heart failure, hypertension, angina pectoris, chronic obstructive pulmonary disease/bronchial asthma, diabetes mellitus (DM), chronic kidney disease, insomnia, cancer, history of myocardial infarction and cerebral infarction), implantation of medical devices (i.e. an implantable cardiac defibrillator or pace maker), CHADS<sub>2</sub> score at enrollment. The patients' prescription information included the following information: one dose package (ODP), prescription by medical specialists other than physicians of the Department of Cardiovascular Diseases, number of medicines, polypharmacy (number of oral medications  $\geq 6$ ), number of administrations, combination use of antiplatelet, prescription of non-oral medication, history of warfarin use, and duration of DOAC exposure.

### Statistical analyses

The internal consistency of the test scores of the MMAS and BIPQ were assessed using Cronbach's alpha coefficients. An acceptable Cronbach's alpha value is  $\geq 0.7$  [21]. Concurrent validity was assessed through the association between the MMAS-8 score and the PDC by Spearman's correlation coefficient, and the cut-point MMAS-8 score of 6 was validated by the significant difference of the mean PDC value between the poor adherence group and the good adherence group. Binary variables were expressed as the proportion and normally distributed continuous variables were expressed as the means and standard deviation. To determine the factors associated with poor adherence, including the patients' characteristics, clinical factors, and illness perceptions, univariate analysis was conducted using the chi-squared test or Fisher's exact test (as appropriate) for proportions and the two-tailed t-test for means. Factors that were associated ( $p < 0.1$ ) with poor adherence in the univariate analysis were included in the multivariate logistic regression analysis with a stepwise procedure to identify risk factors that were independently associated with poor adherence. The BIPQ overall score was not included in the multivariate analysis, as we investigated the influence of each illness perception item on medication adherence. The JMP software program (version 10, SAS Institute Inc., Cary, NC, USA) was used for all the statistical analyses. P-values of  $< 0.05$  were considered to indicate statistical significance.

## Results

### Patients' characteristics and clinical data

Between January 4<sup>th</sup> and April 25<sup>th</sup>, 2017, 129 patients were eligible to participate in this study. Eighteen (14.0%) patients declined to participate in this study and 12 (9.3%) patients did not self-administer their medications (Fig 1). As a result, 99 (76.7%) patients completed the MMAS-8 and BIPQ (S1 and S2 Tables).

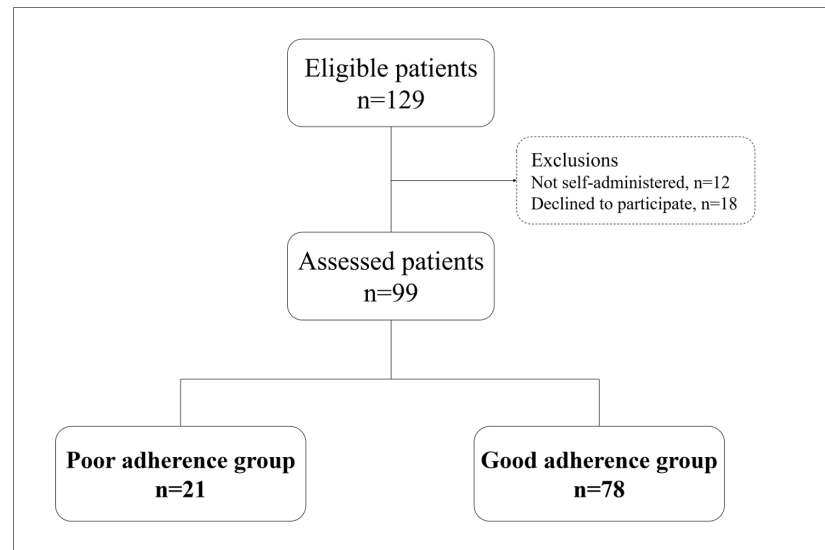

**Fig 1. A flow diagram of this study.** We excluded 18 patients who declined to participate and 12 patients who did not self-administer their medicines. The 99 patients were divided into the poor adherence and good adherence groups according to their MMAS-8 scores.

<https://doi.org/10.1371/journal.pone.0204814.g001>

The patient characteristics, clinical information, and prescription information are listed in Table 1. Seventy-four (74.7%) of the patients were male; the mean age was  $71.4 \pm 9.8$  years; 82 (82.8%) patients were  $\geq 65$  years of age; and 17 (17.4%) lived alone. Fifteen percent and forty-three percent of the patients were current smokers and drinkers, respectively. The most frequently prescribed DOAC was rivaroxaban ( $n = 38$ , 38.4%), followed by apixaban ( $n = 30$ , 30.3%), dabigatran ( $n = 19$ , 19.2%), and edoxaban ( $n = 12$ , 12.1%). The mean duration of DOAC exposure was  $625.0 \pm 461.2$  days. Approximately 70% of the patients had hypertension, and 40% had heart failure as comorbidities. The mean CHADS<sub>2</sub> score was  $1.9 \pm 1.3$ . More than 60% of the patients were prescribed  $\geq 6$  drugs for several conditions, which fulfilled the definition of polypharmacy. Thirty-seven (37.4%) of 99 patients had used warfarin before using DOACs.

### The assessment of medication adherence and illness perceptions

The mean MMAS-8 and BIPQ overall score were 6.8 and 32.3, respectively. The Cronbach's alpha coefficients of the MMAS-8 and BIPQ were 0.705 and 0.707, respectively (S3 and S4 Tables). According to the MMAS-8, 21 (21.2%) of the patients were classified into the poor adherence group, and 78 (78.8%) were classified into the good adherence group. Medication adherence could be assessed by the PDC in 61 patients. The mean PDC and MMAS-8 of these patients were 98.0% and 6.7, respectively. Spearman's rank correlation coefficient was 0.380 ( $p = 0.003$ ). The mean PDC of the patients in the poor adherence group was significantly lower than that in the good adherence group (92.8% vs. 98.9%,  $p < 0.001$ ).

### The association between medication adherence and illness perception

Table 2 shows the illness perception of the patients in the poor and good adherence groups. The poor adherence group showed significantly lower scores for personal control ( $5.5 \pm 2.0$  vs.  $6.9 \pm 2.4$ ,  $p = 0.022$ ) and treatment control ( $7.1 \pm 1.8$  vs.  $8.3 \pm 2.1$ ,  $p = 0.020$ ), and tended to show a higher score for emotional response ( $4.0 \pm 2.7$  vs.  $2.8 \pm 2.8$ ,  $p = 0.086$ ) in comparison to good

**Table 1. The patient characteristics, clinical information, and prescription information.**

| Variables                                  |                    | n = 99 | %     |
|--------------------------------------------|--------------------|--------|-------|
| <b>Patient characteristics</b>             |                    |        |       |
| Gender                                     | Male               | 74     | 74.7  |
| Mean (SD) age in years                     |                    | 71.4   | 9.8   |
|                                            | <65 years of age   | 17     | 17.2  |
|                                            | 65–74 years of age | 43     | 43.4  |
|                                            | 75 < years of age  | 39     | 39.4  |
| Mean (SD) BMI <sup>a</sup>                 |                    | 24.0   | 4.2   |
| Smoking <sup>b</sup>                       |                    | 13     | 15.1  |
| Drinking <sup>c</sup>                      |                    | 37     | 43.0  |
| Admission within 1 year                    |                    | 35     | 35.4  |
| History of adverse effects                 |                    | 17     | 17.2  |
| Single-living <sup>d</sup>                 |                    | 16     | 17.4  |
| <b>Clinical information</b>                |                    |        |       |
| Mean (SD) CHADS <sub>2</sub> score         |                    | 1.9    | 1.3   |
| Comorbidity                                | Heart failure      | 39     | 39.4  |
|                                            | Hypertension       | 70     | 70.7  |
|                                            | Angina pectoris    | 32     | 32.3  |
|                                            | COPD/BA            | 6      | 6.1   |
|                                            | DM                 | 28     | 28.3  |
|                                            | CKD                | 11     | 11.0  |
|                                            | Insomnia           | 15     | 15.2  |
|                                            | Cancer             | 17     | 17.2  |
|                                            | History of MI      | 9      | 9.1   |
|                                            | History of CI      | 9      | 9.1   |
| ICD/PM                                     |                    | 11     | 11.1  |
| <b>Prescription information</b>            |                    |        |       |
| ODP                                        |                    | 27     | 27.3  |
| DOAC                                       | Dabigatran         | 19     | 19.2  |
|                                            | Rivaroxaban        | 38     | 38.4  |
|                                            | Apixaban           | 30     | 30.3  |
|                                            | Edoxaban           | 12     | 12.1  |
| Dosing                                     | Once-daily dosing  | 53     | 53.5  |
|                                            | Twice-daily dosing | 46     | 46.5  |
| Prescription by other medical specialists  |                    | 23     | 23.2  |
| Mean (SD) number of medicines              |                    | 6.7    | 3.4   |
|                                            | Polypharmacy       | 61     | 61.6  |
| Mean (SD) number of administrations        |                    | 2.3    | 1.0   |
| Combination use of antiplatelet            |                    | 19     | 19.2  |
| Prescription of non-oral medication        |                    | 26     | 26.3  |
| History of warfarin use                    |                    | 37     | 37.4  |
| Mean (SD) duration (days) of DOAC exposure |                    | 625.0  | 461.2 |

Number assessed,

<sup>a</sup>. n = 98,

<sup>b</sup>. n = 86,

<sup>c</sup>. n = 86,

<sup>d</sup>. n = 92.

BA, bronchial asthma; BMI, body mass index; CI, cerebral infarction; CKD, chronic kidney disease; COPD, chronic obstructive pulmonary disease; DM, diabetes mellitus; DOAC, direct oral anticoagulant; ICD, implantable cardiac defibrillator; MI, myocardial infarction; ODP, one dose package; PM, pace maker; SD, standard deviation.

<https://doi.org/10.1371/journal.pone.0204814.t001>

**Table 2. The association between medication adherence and illness perception.**

| Items              | Poor adherence, n = 21 |      | Good adherence, n = 78 |      | P value |
|--------------------|------------------------|------|------------------------|------|---------|
|                    | Mean                   | SD   | Mean                   | SD   |         |
| Consequences       | 4.6                    | 2.7  | 3.8                    | 3.3  | 0.312   |
| Timeline           | 7.9                    | 2.0  | 8.1                    | 2.8  | 0.764   |
| Personal control   | 5.5                    | 2.0  | 6.9                    | 2.4  | 0.022   |
| Treatment control  | 7.1                    | 1.8  | 8.3                    | 2.1  | 0.020   |
| Identity           | 2.9                    | 2.4  | 3.1                    | 2.8  | 0.809   |
| Concerns           | 6.9                    | 2.0  | 5.8                    | 3.3  | 0.177   |
| Understanding      | 6.7                    | 1.7  | 7.4                    | 2.4  | 0.247   |
| Emotional response | 4.0                    | 2.7  | 2.8                    | 2.8  | 0.086   |
| BIPQ overall score | 36.9                   | 10.4 | 31.0                   | 12.4 | 0.051   |

BIPQ, Brief Illness Perception Questionnaire; SD, standard deviation.

<https://doi.org/10.1371/journal.pone.0204814.t002>

adherence group. The mean BIPQ overall score in the poor adherence group was tended to be higher than that in the good adherence group (36.9±10.4 vs. 31.0±12.4,  $p = 0.051$ ).

### The univariate analysis of clinical factors associated with poor medication adherence

Table 3 shows the patient characteristics and clinical factors that were associated with poor medication adherence in the univariate analysis. The patients in the poor adherence group were significantly younger (65.0±11.8 vs. 73.2±8.5,  $p < 0.001$ ), fewer patients tended to have a history of warfarin use (19.1% vs. 42.3%,  $p = 0.074$ ) and the duration of DOAC exposure tended to be longer (782.9±389.7 days vs. 582.5±471.9 days,  $p = 0.077$ ) in comparison to the good adherence group; however, these results did not reach statistical significance. The CHADS<sub>2</sub> score, comorbidity, prescription information (i.e. ODP, polypharmacy, and number of administrations) were not associated with medication adherence.

### A multivariate analysis of the factors associated with poor medication adherence

In the multivariate logistic regression analysis, age (per year, odds ratio [OR] 0.912, 95% confidence interval [CI] 0.853–0.965,  $p = 0.001$ ), history of warfarin use (OR 0.181, 95% CI 0.033–0.764,  $p = 0.019$ ), duration of DOAC exposure (per 100 days, OR 1.245, 95% CI 1.084–1.460,  $p = 0.001$ ), and emotional response score (per 1 point, OR 1.235, 95% CI 1.015–1.527,  $p = 0.035$ ) were significantly associated with poor medication adherence in AF patients treated with DOACs (Table 4).

### Discussion

In this cross-sectional pilot study, we found that younger age, a lack of previous warfarin treatment, a longer duration of DOAC exposure, and a stronger emotional response (i.e. feelings of anger, anxiety, and depression resulting from AF) were significantly associated with poor adherence in AF patients. To the best of our knowledge, this is the first study to demonstrate a relationship between adherence to DOACs and illness perceptions in AF patients.

In this study, the Cronbach’s alpha coefficient of the MMAS-8 was 0.705, which reflected acceptable reliability. Then, a significant correlation between the MMAS-8 scores and the PDC was found, and the MMAS-8 cut-point of 6 was validated based on the significant



**Table 3. The clinical factors associated with poor medication adherence in the univariate analysis.**

| Variables                                  | Poor adherence, n = 21 |       | Good adherence, n = 78 |       | P value |        |
|--------------------------------------------|------------------------|-------|------------------------|-------|---------|--------|
|                                            | n                      | %     | n                      | %     |         |        |
| <b>Patient characteristics</b>             |                        |       |                        |       |         |        |
| Male gender                                | 18                     | 85.7  | 56                     | 71.8  | 0.262   |        |
| Mean (SD) age in years                     | 65.0                   | 11.8  | 73.2                   | 8.5   | <0.001  |        |
| Mean (SD) BMI <sup>a</sup>                 | 24.7                   | 5.9   | 23.9                   | 3.6   | 0.430   |        |
| Smoking <sup>b</sup>                       | 5                      | 29.4  | 8                      | 11.6  | 0.122   |        |
| Drinking <sup>c</sup>                      | 8                      | 50.0  | 29                     | 41.4  | 0.532   |        |
| Admission within 1 year                    | 6                      | 28.6  | 29                     | 37.2  | 0.464   |        |
| History of adverse effect                  | 3                      | 14.3  | 14                     | 18.0  | >0.999  |        |
| Single-living <sup>d</sup>                 | 4                      | 21.1  | 12                     | 16.4  | 0.735   |        |
| <b>Clinical information</b>                |                        |       |                        |       |         |        |
| Mean (SD) CHADS <sub>2</sub> score         | 1.9                    | 1.4   | 2.0                    | 1.2   | 0.706   |        |
| Comorbidity                                | Heart failure          | 9     | 42.9                   | 30    | 38.5    | 0.714  |
|                                            | Hypertension           | 13    | 61.9                   | 57    | 73.1    | 0.318  |
|                                            | Angina pectoris        | 4     | 19.1                   | 28    | 35.9    | 0.192  |
|                                            | COPD/BA                | 0     | 0                      | 6     | 7.7     | 0.337  |
|                                            | DM                     | 7     | 33.3                   | 21    | 26.9    | 0.563  |
|                                            | CKD                    | 4     | 19.1                   | 7     | 9.0     | 0.239  |
|                                            | Insomnia               | 4     | 19.1                   | 11    | 14.1    | 0.732  |
|                                            | Cancer                 | 2     | 9.5                    | 15    | 19.2    | 0.514  |
|                                            | History of MI          | 2     | 9.5                    | 7     | 9.0     | >0.999 |
|                                            | History of CI          | 3     | 14.3                   | 6     | 7.7     | 0.395  |
| ICD/PM                                     | 2                      | 9.5   | 9                      | 11.5  | >0.999  |        |
| <b>Prescription information</b>            |                        |       |                        |       |         |        |
| ODP                                        | 5                      | 23.8  | 22                     | 28.2  | 0.387   |        |
| Dosing                                     | Once-daily dosing      | 10    | 47.6                   | 43    | 55.1    | 0.540  |
|                                            | Twice-daily dosing     | 11    | 52.4                   | 35    | 44.9    |        |
| Prescription by other medical specialists  | 3                      | 14.3  | 20                     | 25.6  | 0.788   |        |
| Mean (SD) number of medicines              |                        | 6.0   | 3.3                    | 6.9   | 3.4     | 0.242  |
|                                            | Polypharmacy           | 11    | 52.4                   | 50    | 64.1    |        |
| Mean (SD) number of administrations        | 2.0                    | 0.8   | 2.4                    | 1.0   | 0.105   |        |
| Prescription of non-oral medication        | 4                      | 19.1  | 22                     | 28.2  | 0.578   |        |
| Combination use of antiplatelet            | 3                      | 14.3  | 16                     | 20.5  | 0.756   |        |
| History of warfarin use                    | 4                      | 19.1  | 33                     | 42.3  | 0.074   |        |
| Mean (SD) duration (days) of DOAC exposure | 782.9                  | 389.7 | 582.5                  | 471.9 | 0.077   |        |

Number of poor vs. good adherence,

<sup>a</sup>: 21 vs. 77;

<sup>b</sup>: 17 vs. 69;

<sup>c</sup>: 16 vs. 70;

<sup>d</sup>: 19 vs. 73.

BA, bronchial asthma; CI, cerebral infarction; CKD, chronic kidney disease; COPD, chronic obstructive pulmonary disease; DM, diabetes mellitus; DOAC, direct oral anticoagulant; ICD, implantable cardiac defibrillator; MI, myocardial infarction; ODP, one dose package; PM, pace maker; SD, standard deviation.

<https://doi.org/10.1371/journal.pone.0204814.t003>

difference in the mean PDC value between poor adherence group and good adherence group. Our results show that the Japanese version of the MMAS-8 had an acceptable level of reliability and validity in AF patients receiving DOACs. However, the use of self-reported questionnaires may not reflect the true incidence because of the existence of recall bias among respondents.



**Table 4. The factors associated with poor medication adherence in the multivariate analysis.**

| Predictor variables                        | OR    | 95% CI      | P value |
|--------------------------------------------|-------|-------------|---------|
| Age                                        | 0.912 | 0.853–0.965 | 0.001   |
| History of warfarin use                    | 0.181 | 0.033–0.764 | 0.019   |
| Duration of DOAC exposure <sup>a</sup>     | 1.245 | 1.084–1.460 | 0.001   |
| BIPQ emotional response score <sup>b</sup> | 1.235 | 1.015–1.527 | 0.035   |

BIPQ, Brief Illness Perception Questionnaire; CI, confidence interval; DOAC, direct oral anticoagulant; OR, odds ratio.

<sup>a</sup>OR per 100 days increase.

<sup>b</sup>OR per 1 point increase.

<https://doi.org/10.1371/journal.pone.0204814.t004>

Further studies are needed to evaluate the relationship between the MMAS-8 and other methodologies involving direct (e.g. serum drug concentration) or indirect (e.g. pharmacy refill rates and pill counts) assessments of medication adherence. Broadbent et al. reported that the BIPQ showed good test–retest reliability in renal disease patients and concurrent validity with relevant measures in a variety of illnesses [12]. In our study, the Cronbach’s alpha coefficient of the BIPQ was 0.707, showing that the Japanese version of the BIPQ had an acceptable level of reliability in AF patients receiving DOACs; however, studies of its association with the outcome, disease severity, and quality of life were not performed in this study or in Japan. Further validation studies of BIPQ are therefore needed.

Some previous reports have described risk factors associated with poor adherence in relation to OAC therapy in AF patients. Non-adherence to warfarin appears to be more prevalent among younger patients [22, 23], which is in line with our results in AF patients treated with DOACs. In our study, an analysis stratified by age demonstrated that the prevalence of poor adherence among the patients in the adult group (<65 years of age) was higher than that among patients in the old group (>75 years of age) (38.1% vs. 19.1%,  $p = 0.004$ ). Further studies that consider the lifestyle of patients would be needed. Interestingly, our results demonstrated that the percentage of patients with a history of warfarin use in the good medication adherence group was higher than that in the poor adherence group. A recent report by Manzoor et al. studying medication adherence in AF patients newly initiating a DOAC showed that the rates of PDC and persistence in anticoagulation-experienced patients were significantly higher in comparison to anticoagulation-naïve patients [24], this finding is in accordance with our results. One possible explanation as to why the patients with a history of warfarin use showed better adherence to OAC therapy could be that the medication management that is used when administering warfarin is much stricter than used when administering DOACs, from the viewpoints of routine monitoring of the PT-INR, food-drug interactions, and drug-drug interactions, leading to a high level of consciousness regarding the disease and therapy. In our sub-analysis to compare the BIPQ values of warfarin user and non-users, the mean timeline perception (whether an illness was acute, chronic, or cyclic duration) score of warfarin users was higher than that of warfarin non-users ( $8.9 \pm 2.0$  vs.  $7.5 \pm 2.8$ ,  $p = 0.005$ ); thus, patients with a history of warfarin use might have considered their illness to be chronic. Patients switching from warfarin to DOACs may have a longer perceived illness duration, which could heighten their adherence to OAC therapy. Similarly to medication adherence, persistence defined as the percentage of patients who continue therapy is a very important element for ensuring efficacy and safety in OAC therapy. In one study, which was focused on primary care patients, the probabilities of persistence after 180 and 360 days were 66.0% and 53.1% for rivaroxaban, and 60.3% and 47.3% for dabigatran, respectively [25]. This is supported by our

results, which showed that among patients with poor adherence, the duration of DOAC exposure was longer in comparison to patients with good adherence. Broadbent et al. indicated that hospitalized myocardial infarction patients in whom a diagnosis had not been confirmed showed a higher emotional response, describing a high fear response to an unknown health threat [12]; these findings might be supported by our result, the association between poor adherence and higher scores for emotional response.

### Implications for clinical practice

The findings in this study can help tailor health care providers' interventions in AF patients that may be at risk for poor adherence to DOACs. We identified four risk factors associated with poor adherence, which were either modifiable (i.e. perceived emotional response) or non-modifiable (i.e. younger age, the absence of a history of warfarin use, and a longer duration of OAC therapy). Why younger patients show a poorer adherence to medication than older patients are unclear; however, some younger patients forget to take their medicine on occasion due to irregular patterns of lifestyle, such as overworking companies' employees. Regularly scheduled monitoring and contact with health care providers (e.g. telephone intervention) may improve their medication adherence. Patients without a history of warfarin use and with a longer duration of therapy showed decreased adherence and persistence [25]. The continuous evaluation of patients' preference and educational intervention regarding the need for OACs, the risks and benefits associated with OAC therapy, and a medication regimen using the patient information card recommended by European Heart Rhythm Association can improve their knowledge, motivation, and skills for self-management [26]. On the other hand, modifiable factors, such as illness perceptions, have changed during treatment [17]. Psycho-educational intervention as well as intervention focused on the medical, physical, social, and economic implications may improve patients' knowledge, treatment coherence, and medication brief, especially among patients with negative emotions resulting from chronic disease such as AF [27, 28]. An interdisciplinary team consisting of clinicians, pharmacists, nurses, or clinical psychotherapist should be responsible for the initial and continuous education in AF patients.

### Study limitations

This study is associated with several limitations. First, this was a pilot study conducted in a single university hospital, and the population was relatively small, which might have led to a selection bias in the process of gathering the study population. Participants may have been highly motivated regarding OAC therapy, as was seen in the high PDC and MMAS-8 scores. Second, non-psychological characteristics, such as income and working, were not considered. Third, we could not indicate the degree of adherence or illness perceptions in relation to clinical efficacy and safety in AF patients treated with DOACs.

### Conclusions

In a real-world clinical setting, poor medication adherence to DOACs was significantly associated with a stronger emotional response regarding AF, as well as younger age, the absence of a history of warfarin use, and a longer duration of DOAC use in AF patients. Interdisciplinary intervention by pharmacists, clinicians, nurses, or clinical psychotherapist for patients with factors associated with poor medication adherence may help improve their adherence and/or outcomes. The further evaluation of the factors associated with adherence in AF patients and the development and execution of strategies to improve poor adherence are warranted.

## Supporting information

**S1 Table. The results of MMAS-8.**

(XLSX)

**S2 Table. The results of BIPQ.**

(XLSX)

**S3 Table. The mean, standard deviation, and Cronbach's alpha coefficients of MMAS-8.**

(XLSX)

**S4 Table. The mean, standard deviation, and Cronbach's alpha coefficients of BIPQ.**

(XLSX)

## Acknowledgments

We sincerely appreciate the help of the following doctors: Kunihiro Matsuo, Kazuyuki Shirai, Satoshi Etoh, Yosuke Takamiya, Tomohiko Yamamoto, Yuiko Yano, Tetsu Okuda, and Sayaka Shimizu.

## Author Contributions

**Data curation:** Motoyasu Miyazaki, Miwa Goto.

**Formal analysis:** Motoyasu Miyazaki, Yoshihiko Nakamura, Masanobu Uchiyama.

**Funding acquisition:** Hidetoshi Kamimura, Osamu Imakyure.

**Investigation:** Motoyasu Miyazaki, Akio Nakashima, Yuya Sakamoto, Koichi Matsuo, Keisuke Okamura, Ryoko Mitsutake, Hidenori Urata.

**Methodology:** Motoyasu Miyazaki, Masanobu Uchiyama, Hidetoshi Kamimura, Osamu Imakyure.

**Writing – original draft:** Motoyasu Miyazaki.

## References

1. Inoue H, Fujiki A, Origasa H, Ogawa S, Okumura K, Kubota, et al. Prevalence of atrial fibrillation in the general population of Japan: an analysis based on periodic health examination. *Int J Cardiol.* 2009; 137: 102–107. <https://doi.org/10.1016/j.ijcard.2008.06.029> PMID: 18691774
2. Ruff CT, Giugliano RP, Braunwald E, Hoffman EB, Deenadayalu N, Ezekowitz MD, et al. Comparison of the efficacy and safety of new oral anticoagulants with warfarin in patients with atrial fibrillation: a meta-analysis of randomised trials. *Lancet.* 2014; 383: 955–962. [https://doi.org/10.1016/S0140-6736\(13\)62343-0](https://doi.org/10.1016/S0140-6736(13)62343-0) PMID: 24315724
3. Mekaj YH, Mekaj AY, Duci SB, Miftari EI. New oral anticoagulants: their advantages and disadvantages compared with vitamin K antagonists in the prevention and treatment of patients with thromboembolic events. *Ther Clin Risk Manag.* 2015; 11: 967–977. <https://doi.org/10.2147/TCRM.S84210> PMID: 26150723
4. Raparelli V, Proietti M, Cangemi R, Lip GY, Lane DA, Basili S. Adherence to oral anticoagulant therapy in patients with atrial fibrillation. Focus on non-vitamin K antagonist oral anticoagulants. *Thromb Haemost.* 2017; 117: 209–218. <https://doi.org/10.1160/TH16-10-0757> PMID: 27831592
5. Shore S, Carey EP, Turakhia MP, Jackevicius CA, Cunningham F, Pilote L, et al. Adherence to dabigatran therapy and longitudinal patient outcomes: insights from the veterans health administration. *Am Heart J.* 2014; 167: 810–817. <https://doi.org/10.1016/j.ahj.2014.03.023> PMID: 24890529
6. Villines TC, Schnee J, Fraeman K, Siu K, Reynolds MW, Collins J, et al. A comparison of the safety and effectiveness of dabigatran and warfarin in non-valvular atrial fibrillation patients in a large healthcare system. *Thromb Haemost.* 2015; 114: 1290–1298. <https://doi.org/10.1160/TH15-06-0453> PMID: 26446456

7. Avgil-Tsadok M, Jackevicius CA, Essebag V, Eisenberg MJ, Rahme E, Behloul H, et al. Dabigatran use in elderly patients with atrial fibrillation. *Thromb Haemost*. 2016; 115: 152–160. <https://doi.org/10.1160/TH15-03-0247> PMID: 26354766
8. Schulman S, Shortt B, Robinson M, Eikelboom JW. Adherence to anticoagulant treatment with dabigatran in a real-world setting. *J Thromb Haemost*. 2013; 11: 1295–1299. <https://doi.org/10.1111/jth.12241> PMID: 23855420
9. Coleman CI, Tangirala M, Evers T. Medication adherence to rivaroxaban and dabigatran for stroke prevention in patients with non-valvular atrial fibrillation in the United States. *Int J Cardiol*. 2016; 212: 171–173. <https://doi.org/10.1016/j.ijcard.2016.03.051> PMID: 27038727
10. Castellucci LA, Shaw J, van der Salm K, Erkens P, Le Gal G, Petrich W, et al. Self-reported adherence to anticoagulation and its determinants using the Morisky medication adherence scale. *Thromb Res*. 2015; 136: 727–731. <https://doi.org/10.1016/j.thromres.2015.07.007> PMID: 26272305
11. Baroletti S, Dell'Orfano H. Medication adherence in cardiovascular disease. *Circulation*. 2010; 121: 1455–1458. <https://doi.org/10.1161/CIRCULATIONAHA.109.904003> PMID: 20351303
12. Broadbent E, Petrie KJ, Main J, Weinman J. The brief illness perception questionnaire. *J Psychosom Res*. 2006; 60: 631–637. <https://doi.org/10.1016/j.jpsychores.2005.10.020> PMID: 16731240
13. Saarti S, Hajj A, Karam L, Jabbour H, Sarkis A, El Osta, et al. Association between adherence, treatment satisfaction and illness perception in hypertensive patients. *J Hum Hypertens*. 2016; 30: 341–345. <https://doi.org/10.1038/jhh.2015.86> PMID: 26310182
14. Olszanecka-Glinianowicz M, Almgren-Rachtan A. The adherence and illness perception of patients diagnosed with asthma or chronic obstructive pulmonary disease treated with polytherapy using new generation Cyclohaler. *Postepy Dermatol Alergol*. 2014; 31: 235–246. <https://doi.org/10.5114/pdia.2014.45070> PMID: 25254009
15. Kugbey N, Oppong Asante K, Adulai K. Illness perception, diabetes knowledge and self-care practices among type-2 diabetes patients: a cross-sectional study. *BMC Res Notes*. 2017; 10: 381. <https://doi.org/10.1186/s13104-017-2707-5> PMID: 28797280
16. Iskandarsyah A, de Klerk C, Suardi DR, Sadarjoen SS, Passchier J. Consulting a traditional healer and negative illness perceptions are associated with non-adherence to treatment in Indonesian women with breast cancer. *Psychooncology*. 2014; 23: 1118–1124. <https://doi.org/10.1002/pon.3534> PMID: 24664984
17. Clarksmith DE, Pattison HM, Lip GY, Lane DA. Educational intervention improves anticoagulation control in atrial fibrillation patients: the TREAT randomised trial. *PLoS One*. 2013; 8: e74037. <https://doi.org/10.1371/journal.pone.0074037> eCollection 2013. PMID: 24040156
18. Morisky DE, Ang A, Krousel-Wood M, Ward HJ. Predictive validity of a medication adherence measure in an outpatient setting. *J Clin Hypertens (Greenwich)*. 2008; 10: 348–354.
19. van der Have M, Oldenburg B, Kaptein AA, Jansen JM, Scheffer RC, van Tuyl BA, et al. Non-adherence to Anti-TNF Therapy is Associated with Illness Perceptions and Clinical Outcomes in Outpatients with Inflammatory Bowel Disease: Results from a Prospective Multicentre Study. *J Crohns Colitis*. 2016; 10: 549–555. <https://doi.org/10.1093/ecco-jcc/jjw002> PMID: 26738757
20. Lee GK, Wang HH, Liu KQ, Cheung Y, Morisky DE, Wong MC. Determinants of medication adherence to antihypertensive medications among a Chinese population using Morisky Medication Adherence Scale. *PLoS One*. 2013; 8: e62775. <https://doi.org/10.1371/journal.pone.0062775> Print 2013. PMID: 23638143
21. Karataş T, Özen Ş, Kutlutürkan S. Factor Structure and Psychometric Properties of the Brief Illness Perception Questionnaire in Turkish Cancer Patients. *Asia Pac J Oncol Nurs*. 2017; 4: 77–83. <https://doi.org/10.4103/2347-5625.199080> PMID: 28217734
22. Arnsten JH, Gelfand JM, Singer DE. Determinants of compliance with anticoagulation: A case-control study. *Am J Med*. 1997; 103: 11–17. PMID: 9236480
23. Gallagher AM, Rietbrock S, Plumb J, van Staa TP. Initiation and persistence of warfarin or aspirin in patients with chronic atrial fibrillation in general practice: do the appropriate patients receive stroke prophylaxis? *J Thromb Haemost*. 2008; 6: 1500–1506. <https://doi.org/10.1111/j.1538-7836.2008.03059.x> PMID: 18573187
24. Manzoor BS, Lee TA, Sharp LK, Walton SM, Galanter WL, Nutescu EA. Real-World Adherence and Persistence with Direct Oral Anticoagulants in Adults with Atrial Fibrillation. *Pharmacotherapy*. 2017; 37:1221–1230. <https://doi.org/10.1002/phar.1989> PMID: 28730619
25. Beyer-Westendorf J, Ehken B, Evers T. Real-world persistence and adherence to oral anticoagulation for stroke risk reduction in patients with atrial fibrillation. *Europace*. 2016; 18: 1150–1157. <https://doi.org/10.1093/europace/euv421> PMID: 26830891
26. Steffel J, Verhamme P, Potpara TS, Albaladejo P, Antz M, Desteghe L, et al. The 2018 European Heart Rhythm Association Practical Guide on the use of non-vitamin K antagonist oral anticoagulants in

patients with atrial fibrillation: executive summary. *Europace*. 2018; 00: 1–12. <https://doi.org/10.1093/europace/euy054> PMID: 29562331

27. Butler JA, Peveler RC, Roderick P, Smith PW, Horne R, Mason JC. Modifiable risk factors for non-adherence to immunosuppressants in renal transplant recipients: a cross-sectional study. *Nephrol Dial Transplant*. 2004; 19: 3144–3149. <https://doi.org/10.1093/ndt/gfh505> PMID: 15479748
28. Balfour L, Kowal J, Silverman A, Tasca GA, Angel JB, Macpherson PA, et al. A randomized controlled psycho-education intervention trial: Improving psychological readiness for successful HIV medication adherence and reducing depression before initiating HAART. *AIDS Care*. 2006; 18:830–838. <https://doi.org/10.1080/09540120500466820> PMID: 16971295
